# Supplementary material for: Smartphone Integration for Physical Sciences: the Readiness of South African Teachers and Learners
Source: Research Square preprint supplement (doi:10.21203/rs.3.rs-5383247/v1), 2024-12-19
Supplement: Supplementary file 1 [file 9b5c5c0b601ded11a38c19d9.docx]

**Tables**

**Table 1:** *Learners' and Teachers' Average Reliability Statistics from the Closed-form Questionnaire*


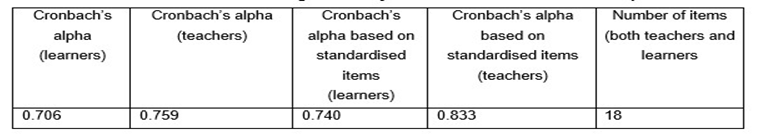


**Table 2:** *Items in the Questionnaire and Descriptive Statistics related to Teachers*


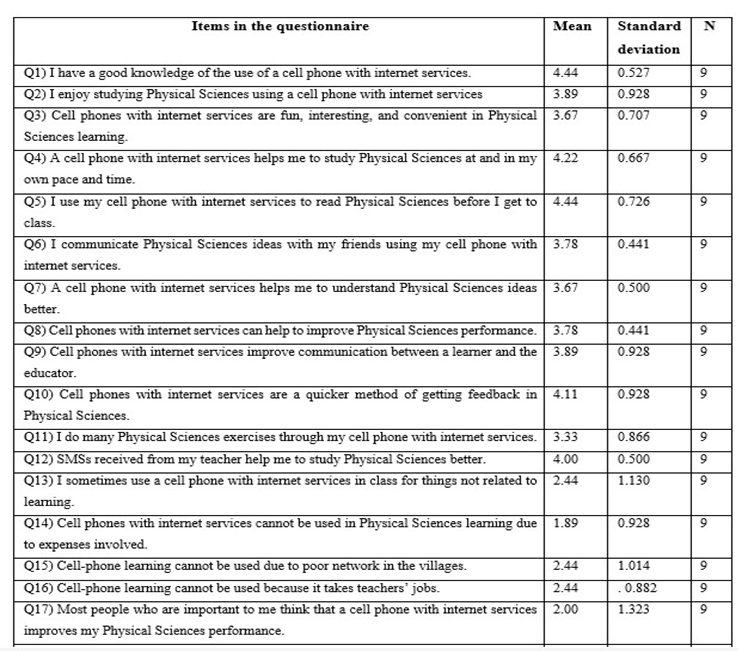


**Table 3:** *Consolidated Quantitative Results for Teachers*


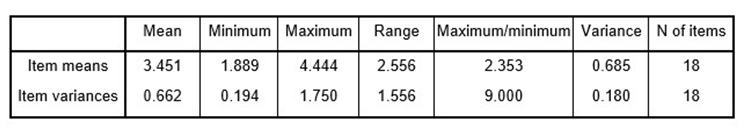


***Table 4:*** *Group Statistics*


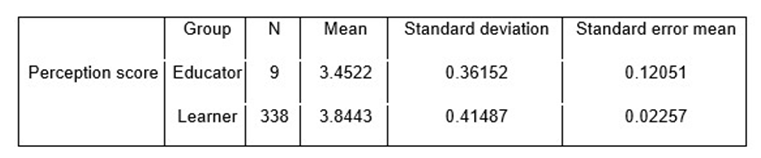


***Table 5:*** *T-test Comparison of Learners' and Teachers' Perceptions of Smartphone Use*

**
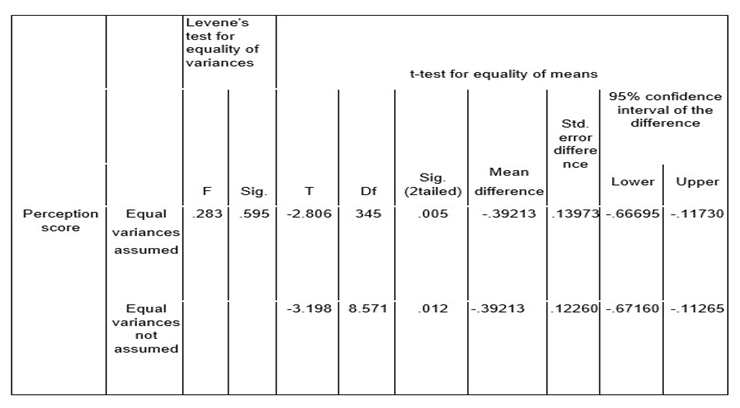
**


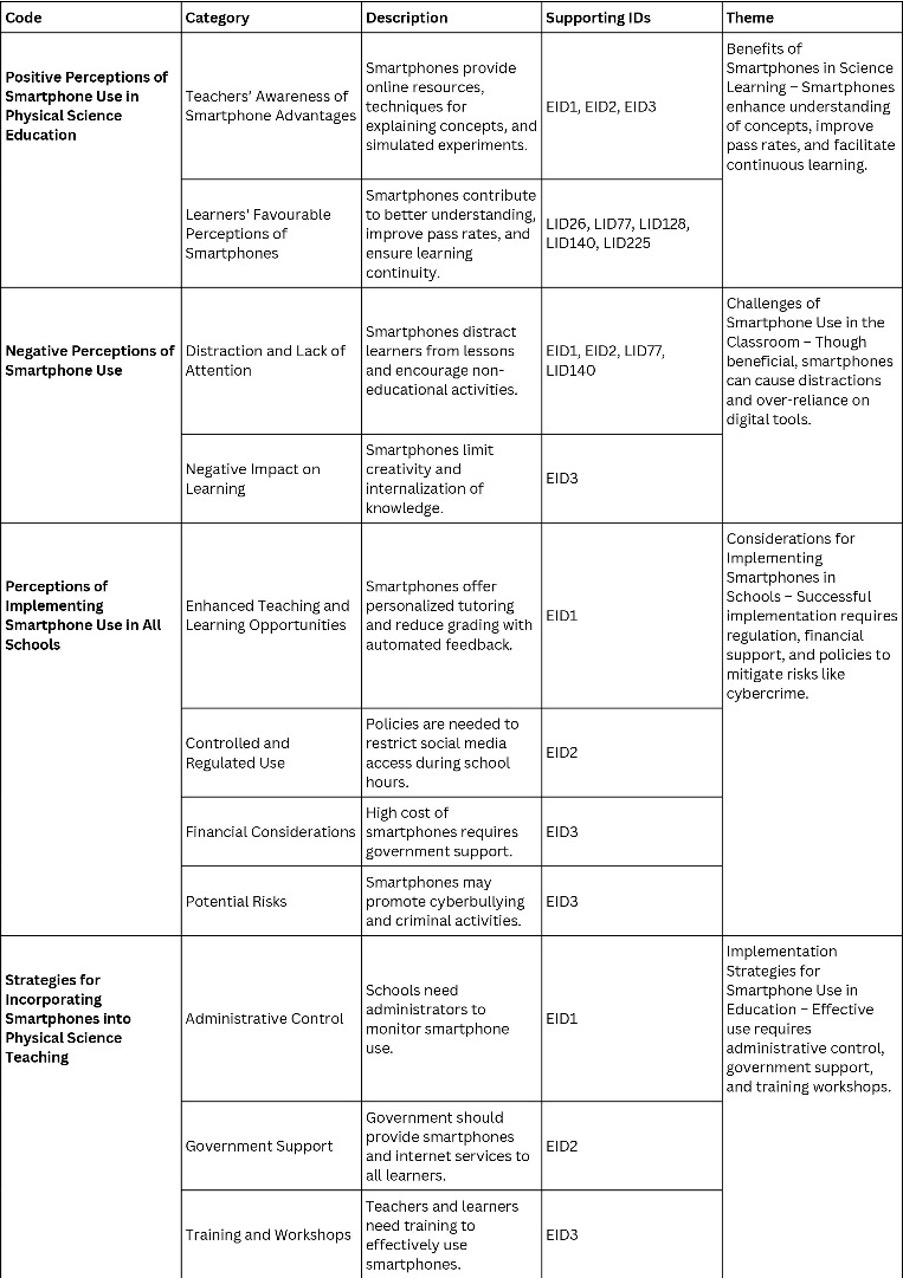
***Table 6:*** *Codes, categories and themes about perceptions of smartphone use*
